# Supplementary material
Source: PubMed Central journal article supplement (PMC3735937)
Supplement: supp_M037556_jlr.M037556-1.pdf [file supp_M037556_jlr.M037556-1.pdf]

## **Supporting Information**

### **Table of content**

**Supporting Information Fig. S1**

**Supporting Information Fig. S2**

**Supporting Information Fig. S3**

**Supporting Information Fig. S4**

**Supporting Information Fig. S5**

**Supporting Information Table I.**

**Supporting Information Methods**

Supporting Information Fig. S1

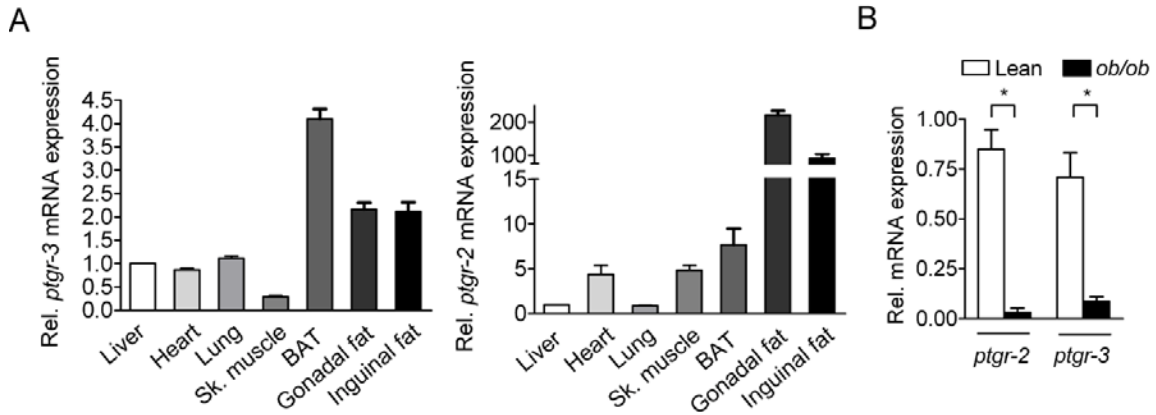

**Fig. S1.** The expression patterns of PTGR-2 and PTGR-3 mRNA in tissues and cells. (A) Tissue distribution of PTGR-2 and PTGR-3 mRNA from 12-wk-old mice C57BL/6 mice. (B) Expression of PTGR-2 and PTGR-3 mRNA from adipose tissue of 12-wk-old lean and *ob/ob* mice. \*  $P < 0.05$  versus Lean. The bars indicate the means  $\pm$  SE for tissue or cells from three independent replicates ( $n = 3$ ).

## Supporting Information Fig. S2

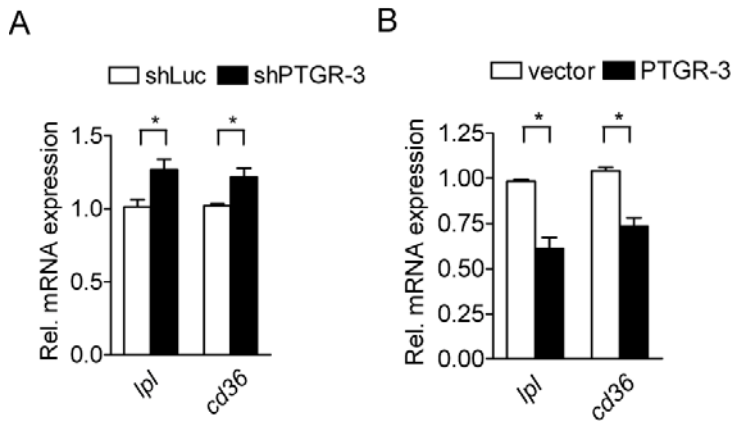

**Fig. S2.** Expression of lipid metabolism-related genes in genetically modified 3T3-L1 cells after 8 day hormonal induction. (A) Expression of adipogenic marker genes (*lpl* and *cd36*) in shRNA control and PTGR-3-knockdown cells. (B) Expression of adipogenic marker genes (*lpl* and *cd36*) in vector control and PTGR-3-overexpressing cells. The bars indicate the means  $\pm$  SE for cells from three independent replicates (n = 3). \* P < 0.05 versus shLuc.

### Supporting Information Fig. S3

A

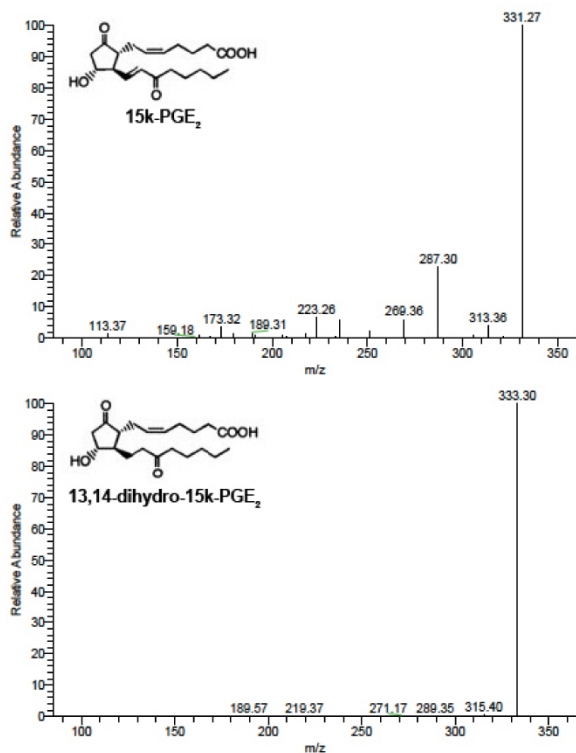

B

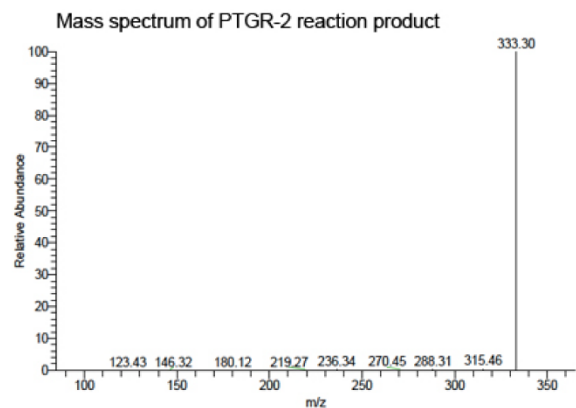

**Fig. S3.** Mass spectrum of 15-keto-PGE<sub>2</sub> and 13,14-dihydro-15-keto-PGE<sub>2</sub>. (A) LC-MS/MS spectrum of standard molecule of 15-keto-PGE<sub>2</sub> (upper panel) and 13,14-dihydro-15-keto-PGE<sub>2</sub> (lower panel) were identified from fragmentation of the molecular anions of 15-keto-PGE<sub>2</sub> (m/z 349) and 13,14-dihydro-15-keto-PGE<sub>2</sub> (m/z 351). (B) LC-MS/MS spectrum of PTGR-2 enzymatic reaction product. 15-keto-PGE<sub>2</sub> was incubated with recombinant PTGR-2 and NADPH for 30 min at 37 °C. Mass spectrum of 13,14-

dihydro-15-keto-PGE<sub>2</sub> from enzymatic reaction product was identified by LC-MS/MS compared with standard molecule of 13,14-dihydro-15-keto-PGE<sub>2</sub>.

**Supporting Information Fig. S4**

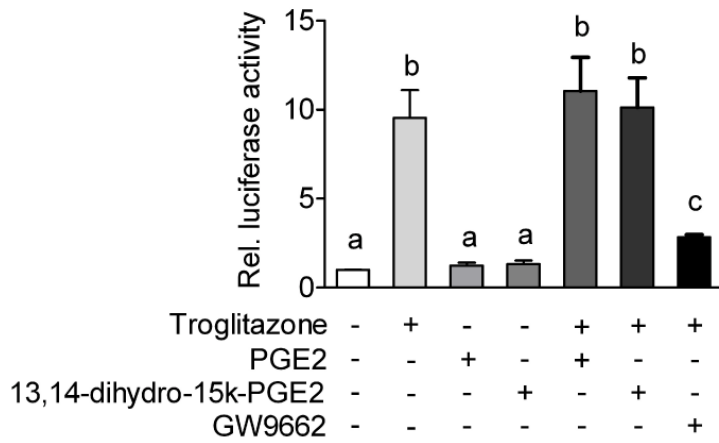

**Fig. S4.** The effect of transactivation of PGE<sub>2</sub> and 13,14-dihydro-15-keto-PGE<sub>2</sub> on ligand binding domain of PPAR $\gamma$ . 293 cells were transfected with expression vectors (CMX-GAL4 and CMX-GAL4-PPAR $\gamma$ ) and UAS<sub>G</sub> $\times$ 4-TK-LUC reporter plasmid for 16 hour and then incubated cells in growth medium with or without treatments (1  $\mu$ M troglitazone, 10  $\mu$ M PGE<sub>2</sub>, 10  $\mu$ M 13,14-dihydro-15-keto-PGE<sub>2</sub> and 1  $\mu$ M GW9662) for 24 hour. The activity of firefly luciferase was determined and normalized to the activity of renilla luciferase. The bars indicate the means  $\pm$  SE for three independent replicates (n=3). Different superscripts indicate significant difference ( $P \leq 0.05$ ).

**Supporting Information Fig. S5**

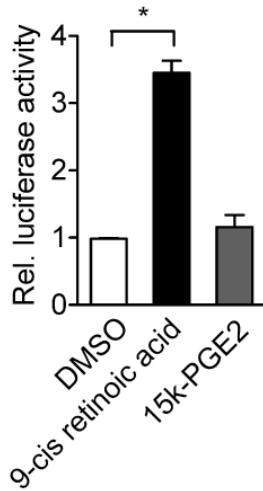

**Fig. S5.** The effect of 15-keto-PGE<sub>2</sub> on retinoid X receptor response element (RXRE)-driven luciferase activity. 293 cells were transfected with RXRE-LUC reporter plasmid for 16 hour and then incubated cells in growth medium with or without treatments (5 μM 9-cis retinoic acid and 10 μM 15-keto-PGE<sub>2</sub>) for 24 hour. The activity of firefly luciferase was determined and normalized to the activity of renilla luciferase. The bars indicate the means ± SE for three independent replicates (n=3). \* P < 0.05 versus DMSO.

**Supporting Information Table I. Primer sequences for quantitative reverse transcription-PCR**

| Gene            | Sequence                                    |
|-----------------|---------------------------------------------|
| <i>ucp1</i>     | Sense 5'-CGTACCAAGCTGTGCGATGT-3'            |
|                 | Anti-sense 5'-TAGAAGCCCAATGATGTTTCAGT-3'    |
| <i>ucp2</i>     | Sense 5'-CCGGGCTGGTGGTGGTC-3'               |
|                 | Anti-sense 5'-ACACCTTTCCAGAGGCC-3'          |
| <i>ucp3</i>     | Sense 5'-CATCGCCAGGGAGGAAGGA-3'             |
|                 | Anti-sense 5'-GTTGACAATGGCATTCTTGTGA-3'     |
| <i>ppara</i>    | Sense 5'-TGCCAAGGAGTCGAGGATGT-3'            |
|                 | Anti-sense 5'-TCGGCACCCAGGAACCAA-3'         |
| <i>pparβ/δ</i>  | Sense 5'-AATGCGCTGGAGCTCGATGAC-3'           |
|                 | Anti-sense 5'-ACTGGCTGTCAGGGTGGTTG-3'       |
| <i>ppary</i>    | Sense 5'-CAAGAATACCAAAGTGCGATCAA-3'         |
|                 | Anti-sense 5'-GAGCTGGGTCTTTTCAGAATAATAAG-3' |
| <i>atgl</i>     | Sense 5'-TGTGGCCTCATTCTCCTAC-3'             |
|                 | Anti-sense 5'-TCGTGGATGTTGGTGGAGCT-3'       |
| <i>hsl</i>      | Sense 5'-GGCTTACTGGGCACAGATACCT-3'          |
|                 | Anti-sense 5'-CTGAAGGCTCTGAGTTGCTCAA-3'     |
| <i>ptgr-2</i>   | Sense 5'-CAGGGTGGAAGAGTTCAGTTT-3'           |
|                 | Anti-sense 5'-CCAGTGTCTCGTTCATCTTAC-3'      |
| <i>ptgr-3</i>   | Sense 5'-GGAAGTGTGAGGGAAGAAA-3'             |
|                 | Anti-sense 5'-TAACGTGGCACTTGGCTATC-3'       |
| <i>lpl</i>      | Sense 5'-GGATGGACGGTAAGAGTGATTC-3'          |
|                 | Anti-sense 5'-ATCCAAGGGTAGCAGACAGGT-3'      |
| <i>cd36</i>     | Sense 5'-CCCCGTGCCTCCTCCCAGAA-3'            |
|                 | Anti-sense 5'-GGCTAGGAAACCATCCACCAGTTGC-3'  |
| <i>fas</i>      | Sense 5'-CCCTTGATGAAGAGGGATCA-3'            |
|                 | Anti-sense 5'-GAACAAGGCGTTAGGGTTGA-3'       |
| <i>acc</i>      | Sense 5'-AACATCCCCACGCTAACAG-3'             |
|                 | Anti-sense 5'-CTGACAAGGTGGCGTGAAG-3'        |
| <i>srebp-1c</i> | Sense 5'-GGAGCCATGGATTGCACATT-3'            |
|                 | Anti-sense 5'-GCTTCCAGAGAGGAGGCCAG-3'       |
| <i>gapdh</i>    | Sense 5'-GGTGAAGTTCGGTGTGAACG-3'            |
|                 | Anti-sense 5'-CTCGCTCCTGGAAGATGGTG-3'       |

Abbreviations used: uncoupling protein 1, UCP1; uncoupling protein 2, UCP2; uncoupling protein 3, UCP3; peroxisome proliferator-activated receptor  $\alpha$ , PPAR $\alpha$ ; peroxisome proliferator-activated receptor  $\beta/\delta$ , PPAR $\beta/\delta$ ; peroxisome proliferator-activated receptor  $\gamma$ , PPAR $\gamma$ ; adipose triglyceride lipase, ATGL; hormone sensitive lipase, HSL; sterol regulatory element-binding transcription factor-1c, SREBP-1c; acetyl-CoA carboxylase, ACC; fatty acid synthase, FAS; glycerol-3-phosphate dehydrogenase, GPDH; fatty acid translocase, CD36; lipoprotein lipase, LPL; PTGR-2, prostaglandin



reductase-2; PTGR-3 prostaglandin reductase-3; glyceraldehyde-3-phosphate  
dehydrogenase, GAPDH.

### **Supporting information methods**

**Quantitative reverse transcription-PCR.** Tissue and cellular RNA was extracted using TRIzol (Invitrogen, Carlsbad, CA, USA). Reverse transcription was performed with a Transcriptor Reverse Transcriptase kit (Roche Applied Science, Indianapolis, IN, USA). Quantitative reverse transcriptase-PCR was performed using ABI PRISM 7000 sequence detector system (Applied Biosystems, Foster City, CA, USA) and KAPA SYBR® FAST qPCR Kit (Kapa Biosystems, Inc., Boston, MA, USA). PCR was performed by 40 cycles of 95°C for 30 s, 58–60°C for 60 s, and 72°C for 30 s. Glyceraldehyde-3-phosphate dehydrogenase (GAPDH) expression was determined as the internal control gene. The sequence of primers for quantitative reverse transcription-PCR was listed in Supporting Information Table I. The mRNA expression of each gene was normalized to its GAPDH mRNA expression in the same sample. Threshold cycle ( $C_t$ ) values were obtained and relative gene expression was calculated using the formula  $(1/2)^{C_t \text{ target genes} - C_t \text{ GAPDH}}$ .

**Retinoid X receptor activity assay.** Confluent 293T cell were incubated with reporter plasmids (retinoid X receptor response element-driven luciferase and CMV-driven renilla luciferase vectors) and lipofectamine. After 16 hour of transfection, media were changed to growth media without or with chemicals (5  $\mu\text{M}$  9-cis retinoic acid and 10  $\mu\text{M}$  15-keto-PGE<sub>2</sub>). Twenty-four hours after treatment, cells were harvested for determination of luciferase activity (Dual-Glo luciferase assay system, Promega).
